# Supplementary material for: RAD21 promotes oncogenesis and lethal progression of prostate cancer
Source: PubMed Central journal article supplement — Proc Natl Acad Sci U S A. 2024 Aug 27;121(36):e2405543121. doi: 10.1073/pnas.2405543121 (PMC11388324; doi:10.1073/pnas.2405543121), 2024-08-27
Supplement: pnas.2405543121.sapp.pdf [file pnas.2405543121.sapp.pdf]

## Supporting Information for

**“*RAD21* promotes oncogenesis and lethal progression of prostate cancer”**

Xiaofeng A. Su, Konrad H. Stopsack, Daniel R. Schmidt, Duanduan Ma, Zhe Li, Paul A. Scheet, Kathryn L. Penney, Tamara L. Lotan, Wassim Abida, Elise G. DeArment, Kate Lu, Thomas Janas, Sofia Hu, Matthew G. Vander Heiden, Massimo Loda, Monica Boselli, Angelika Amon, Lorelei A. Mucci

Corresponding Author: Xiaofeng A. Su.  
Email : [xsu@cpdr.org](mailto:xsu@cpdr.org)

**This PDF file includes:**

**Table S1-S3.**

**Figure S1-S7.**

**Supporting text**

**SI references**

**Table S1.** Expression in tumor and normal tissue, and difference (95% confidence interval), in arbitrary units (comparable between genes), for the 20 genes with the largest difference and *RAD21*.

| Rank | Gene            | Tumor | Normal | Difference        |
|------|-----------------|-------|--------|-------------------|
| 1    | <i>TRIB1</i>    | 5.33  | 4.52   | 0.82 (0.69, 0.94) |
| 2    | <i>MAL2</i>     | 5.04  | 4.25   | 0.79 (0.66, 0.92) |
| 3    | <i>SNORA40</i>  | 8.83  | 8.24   | 0.58 (0.47, 0.70) |
| 4    | <i>TP53INP1</i> | 5.12  | 4.57   | 0.55 (0.44, 0.66) |
| 5    | <i>MYC</i>      | 5.27  | 4.73   | 0.55 (0.45, 0.65) |
| 6    | <i>TPD52</i>    | 5.68  | 5.15   | 0.52 (0.41, 0.64) |
| 7    | <i>SNORD5</i>   | 8.86  | 8.33   | 0.52 (0.42, 0.62) |
| 8    | <i>PTP4A3</i>   | 6.06  | 5.55   | 0.51 (0.41, 0.61) |
| 9    | <i>FABP5</i>    | 4.83  | 4.32   | 0.51 (0.34, 0.68) |
| 10   | <i>SNORD54</i>  | 3.93  | 3.44   | 0.49 (0.37, 0.61) |
| 11   | <i>ESRP1</i>    | 5.13  | 4.64   | 0.49 (0.39, 0.59) |
| 12   | <i>ZFAND1</i>   | 4.34  | 3.90   | 0.43 (0.32, 0.55) |
| 13   | <i>GRHL2</i>    | 5.15  | 4.75   | 0.40 (0.29, 0.52) |
| 14   | <i>LYPLA1</i>   | 3.89  | 3.50   | 0.39 (0.31, 0.47) |
| 15   | <i>SLC10A5</i>  | 2.13  | 1.76   | 0.37 (0.25, 0.49) |
| 16   | <i>RIPK2</i>    | 4.32  | 3.96   | 0.36 (0.29, 0.43) |
| 17   | <i>NCALD</i>    | 3.52  | 3.16   | 0.36 (0.25, 0.47) |
| 18   | <i>RPL7</i>     | 8.34  | 8.00   | 0.34 (0.27, 0.41) |
| 19   | <i>FAM84B</i>   | 3.37  | 3.03   | 0.34 (0.26, 0.41) |
| 20   | <i>TSTA3</i>    | 3.88  | 3.56   | 0.32 (0.25, 0.39) |
| 98   | <i>RAD21</i>    | 4.46  | 4.36   | 0.10 (0.02, 0.18) |

**Table S2.** Characteristics of patients with tumor–normal sequencing, MSK-IMPACT Clinical-Genomic Database, sequenced 2014–2020, by oncogenic *RAD21* alterations. Shown are count (percent) or median (interquartile range).

|                                         | By <i>RAD21</i> status |                      |
|-----------------------------------------|------------------------|----------------------|
|                                         | Intact                 | <i>RAD21</i> altered |
| <b><i>N</i></b>                         | 2,504                  | 88                   |
| <b>Age at diagnosis (years)</b>         | 63.2 (56.7, 68.8)      | 64.2 (56.7, 70.8)    |
| <b>Age at sample (years)</b>            | 65.7 (59.3, 72.1)      | 68.2 (62.4, 74.9)    |
| <b>Diagnosis to sample (months)</b>     | 2.4 (0.0, 35.4)        | 11.8 (0.0, 62.0)     |
| <b>Diagnosis to sequencing (months)</b> | 22.2 (5.5, 77.6)       | 27.7 (5.2, 79.4)     |
| <b>Self-reported race</b>               |                        |                      |
| Asian                                   | 76 (3%)                | 3 (4%)               |
| White                                   | 2,095 (89%)            | 70 (83%)             |
| Black                                   | 194 (8%)               | 11 (13%)             |
| Unknown                                 | 139                    | 4                    |
| <b>PSA at diagnosis (ng/ml)</b>         | 9.0 (5.4, 26.8)        | 13.6 (6.2, 51.0)     |
| Unknown                                 | 155                    | 7                    |
| <b>Gleason score</b>                    |                        |                      |
| <7                                      | 196 (9%)               | 8 (11%)              |
| 3+4                                     | 372 (16%)              | 8 (11%)              |
| 4+3                                     | 392 (17%)              | 13 (18%)             |
| 8                                       | 455 (20%)              | 10 (14%)             |
| 9-10                                    | 879 (38%)              | 34 (47%)             |
| Unknown                                 | 210                    | 15                   |
| <b>Stage M1 at diagnosis</b>            | 712 (28%)              | 34 (39%)             |
| <b>Sample tissue</b>                    |                        |                      |
| Prostate                                | 1,684 (67%)            | 34 (39%)             |
| Lymph node                              | 345 (14%)              | 24 (27%)             |
| Bone                                    | 259 (10%)              | 16 (18%)             |
| Visceral                                | 140 (6%)               | 10 (11%)             |
| Other soft tissue                       | 76 (3%)                | 4 (5%)               |
| <b>Extent of disease at sequencing</b>  |                        |                      |
| Localized                               | 693 (28%)              | 9 (10%)              |
| Regional nodes                          | 322 (13%)              | 11 (12%)             |
| Metastatic hormone-sensitive            | 775 (31%)              | 31 (35%)             |
| Non-metastatic castration-resistant     | 33 (1%)                | 0 (0%)               |
| Metastatic castration-resistant         | 671 (27%)              | 36 (41%)             |
| Metastatic, variant histology           | 10 (0%)                | 1 (1%)               |
| <b>Oncogenic <i>MYC</i> alteration</b>  | 77 (3%)                | 67 (76%)             |
| <b>Chromosome arm 8q gain</b>           | 738 (37%)              | 64 (88%)             |
| Unknown                                 | 491                    | 15                   |

**Table S3.** Organoid growth conditions and antibodies.

Tab-1: Growth Condition

| Medium: Advanced DMEM/F-12 (Thermo Fisher: 12634010) supplemented with HEPES (10mM), 2mM GlutaMAX and 1xpenicillin/streptomycin |               |             |                     |
|---------------------------------------------------------------------------------------------------------------------------------|---------------|-------------|---------------------|
| Additive factors                                                                                                                | Vendor        | Catelog #   | Final concentration |
| B27                                                                                                                             | Thermo Fisher | 17504044    | 50xdilution         |
| N-acetylcystein                                                                                                                 | Sigma-aldrich | A7250-10G   | 1.25mM              |
| EGF                                                                                                                             | VWR           | 10788-228   | 50ng/mL             |
| Noggin                                                                                                                          | PeptoTech     | 250-38-20ug | 100ng/mL            |
| R-spondin 1                                                                                                                     | PeptoTech     | 315-32      | 500ng/mL            |
| A83-01                                                                                                                          | Cayman        | 9001799     | 200nM               |
| DHT                                                                                                                             | Sigma-aldrich | D-073-1ML   | 1nM                 |
| Y-27632 dihydrochloride                                                                                                         | Cayman        | 10005583    | 10 $\mu$ M          |

Tab-2: Antibodies

| Antibodies                                                                     | Source                    | Identifier (RRID) | Type      | Dilution                    | Experiment |
|--------------------------------------------------------------------------------|---------------------------|-------------------|-----------|-----------------------------|------------|
| Anti-RAD21                                                                     | Millipore sigma           | AB_417383         | Primary   | 1:1000 or 1:500             | WB         |
| Phospho-Histone H2A.X (Ser139) Antibody                                        | Cell Signaling Technology | AB_2118010        | Primary   | 1:1000 for WB; 1:200 for IF | WB; IF     |
| Recombinant Anti-ERG antibody [EPR3864]                                        | Abcam                     | AB_2905642        | Primary   | 1:1000                      | WB         |
| Cleaved Caspase-3 (Asp175) Antibody                                            | Cell Signaling Technology | AB_2341188        | Primary   | 1:1000 for WB; 1:200 for IF | WB; IF     |
| Phospho-Akt (Ser473) (D9E)                                                     | Cell Signaling Technology | RRID:AB_2315049   | Primary   | 1:1000                      | WB         |
| Anti-Cytokeratin 8 antibody [EP1628Y] (ab53280)                                | Abcam                     | AB_2890924        | Primary   | 1:200                       | IHC        |
| Anti-p63 antibody [4A4]                                                        | Abcam                     | AB_1006051        | Primary   | 1:200                       | IHC        |
| Androgen Receptor Polyclonal Antibody                                          | Thermo Fisher Scientific  | AB_325809         | Primary   | 1:100                       | IF         |
| GAPDH Antibody (G-9)                                                           | Santa Cruz Biotechnology  | AB_10847862       | Primary   | 1:1000                      | WB         |
| alpha Tubulin Monoclonal Antibody (YL1/2)                                      | Thermo Fisher Scientific  | AB_2210201        | Primary   | 1:1000                      | WB         |
| Vinculin                                                                       | Sigma-Aldrich             | AB_477629         | Primary   | 1:1000                      | WB         |
| Donkey Anti-Mouse IgG (H+L) Antibody, Alexa Fluor 488 Conjugated               | Invitrogen                | AB_141607         | Secondary | 1:400                       | IF         |
| Goat anti-Rabbit IgG (H+L) Cross-Adsorbed Secondary Antibody, Alexa Fluor 546  | Invitrogen                | AB_2534077        | Secondary | 1:400                       | IF         |
| Goat anti-Rabbit IgG (H+L) Cross-Adsorbed Secondary Antibody, Alexa Fluor™ 488 | Thermo Fisher Scientific  | AB_143165         | Secondary | 1:400                       | IF         |
| DyLight 800 Goat Anti-Rat IgG                                                  | BioRad                    | AB_2556604        | Secondary | 1:10000                     | WB         |
| Anti-mouse IgG (H+L) (DyLight™ 680 Conjugate)                                  | Cell Signaling Technology | AB_614942         | Secondary | 1:10000                     | WB         |
| Anti-rabbit IgG (H+L) (DyLight™ 800 4X PEG Conjugate)                          | Cell Signaling Technology | AB_2556775        | Secondary | 1:10000                     | WB         |
| WB: Western blot                                                               |                           |                   |           |                             |            |
| IF: immunofluorescence                                                         |                           |                   |           |                             |            |
| IHC: immunohistochemistry                                                      |                           |                   |           |                             |            |

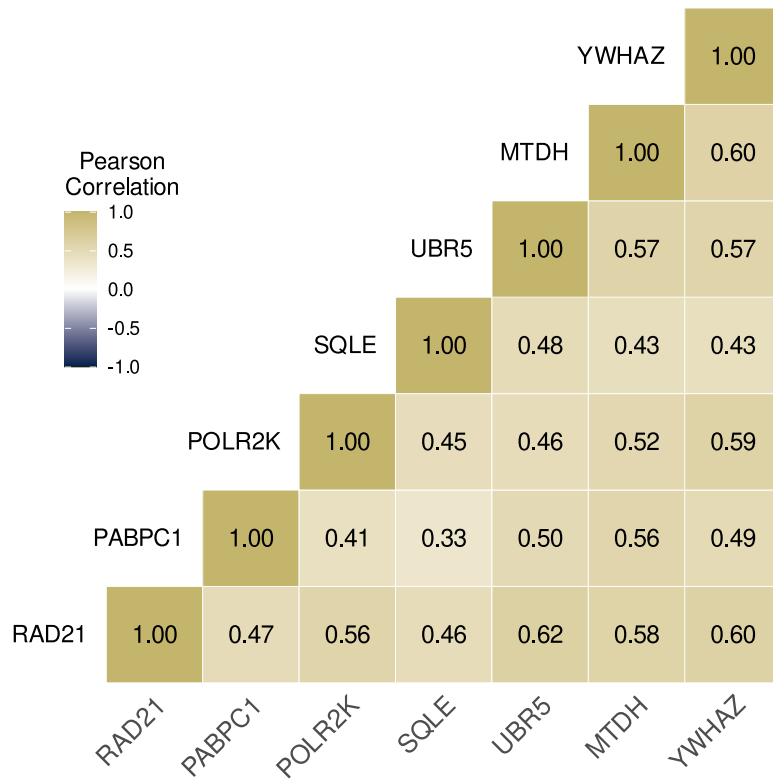

**Figure S1.** Pearson correlation between tumor mRNA expression levels of chr8q genes most strongly associated with risk of lethal prostate cancer (OR > 2).

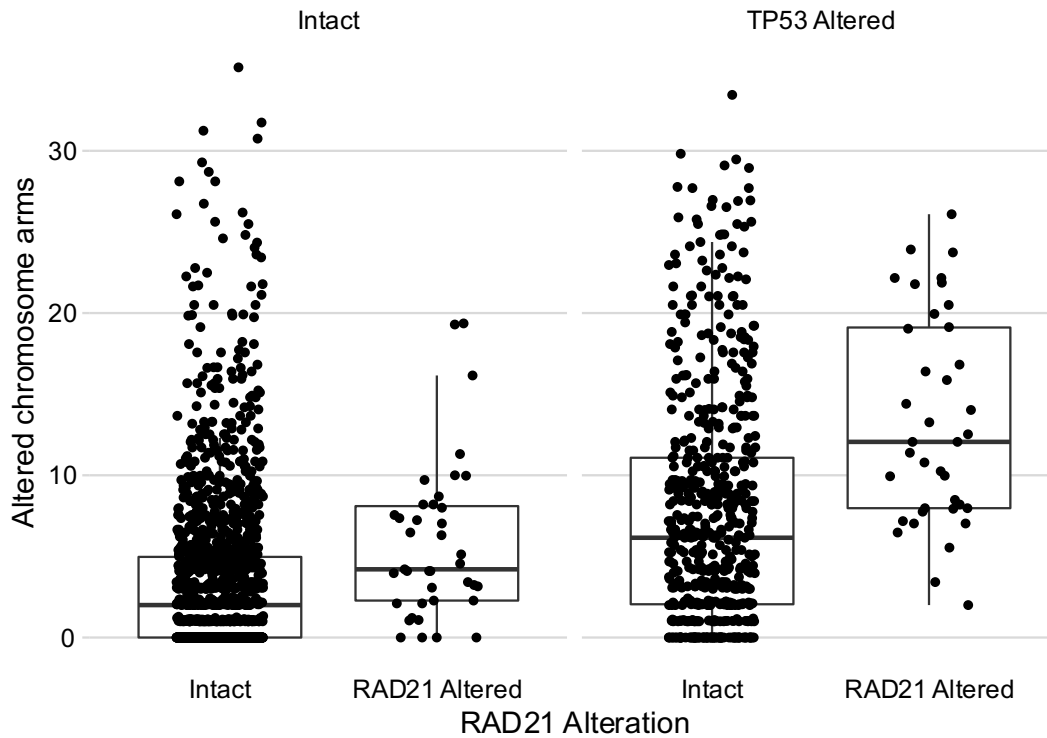

**Figure S2.** Counts of predicted altered chromosome arms by oncogenic RAD21 alterations and oncogenic *TP53* alterations, MSK-IMPACT Prostate Clinical-Genomic Database ( $n = 2,592$ ), sequenced 2014–2020. Boxes indicate interquartile ranges, whiskers extend 1.5 times the interquartile range, thick horizontal lines indicate the median.

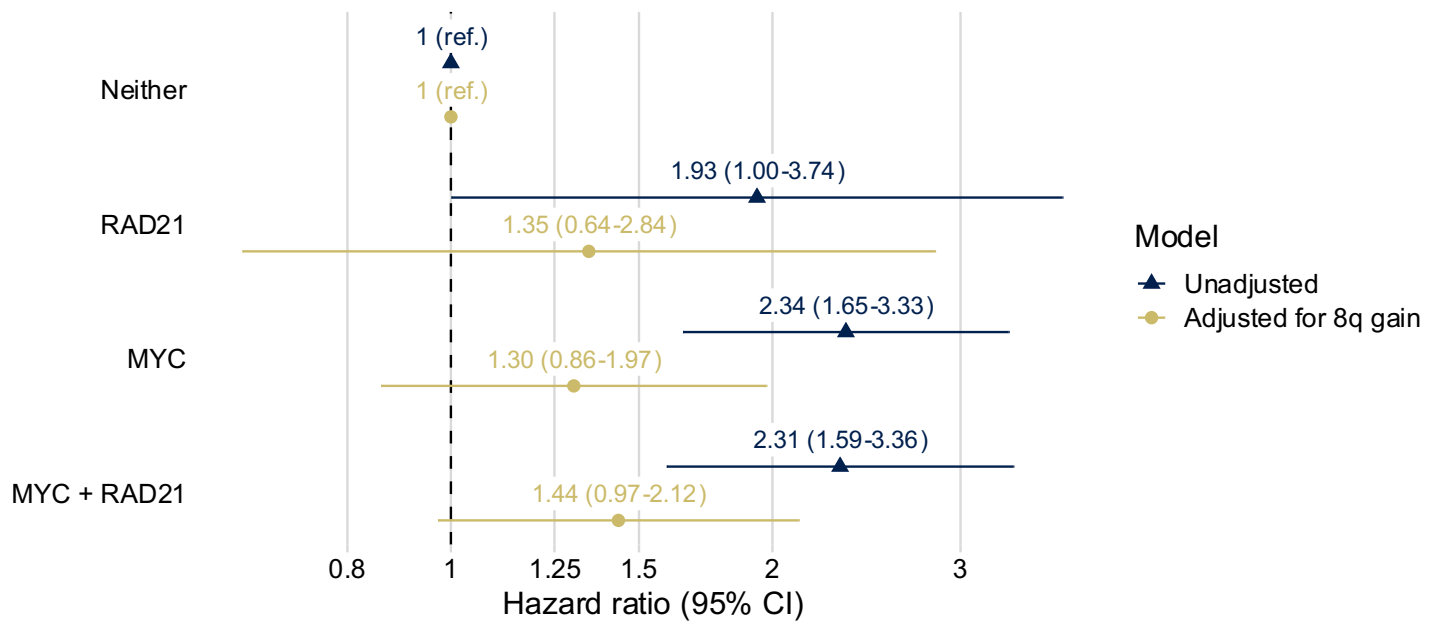

**Figure S3.** Association of oncogenic *RAD21* and *MYC* alterations with overall survival, MSK-IMPACT Prostate Clinical-Genomic Database, with survival follow-up 2014–2021, based on 38 deaths among the 88 patients with *RAD21*-altered tumors and 614 deaths among the 2,504 patients with *RAD21*-intact tumors. This joint classification by *RAD21* and *MYC* complements the estimate for *RAD21* alone shown in the main text.

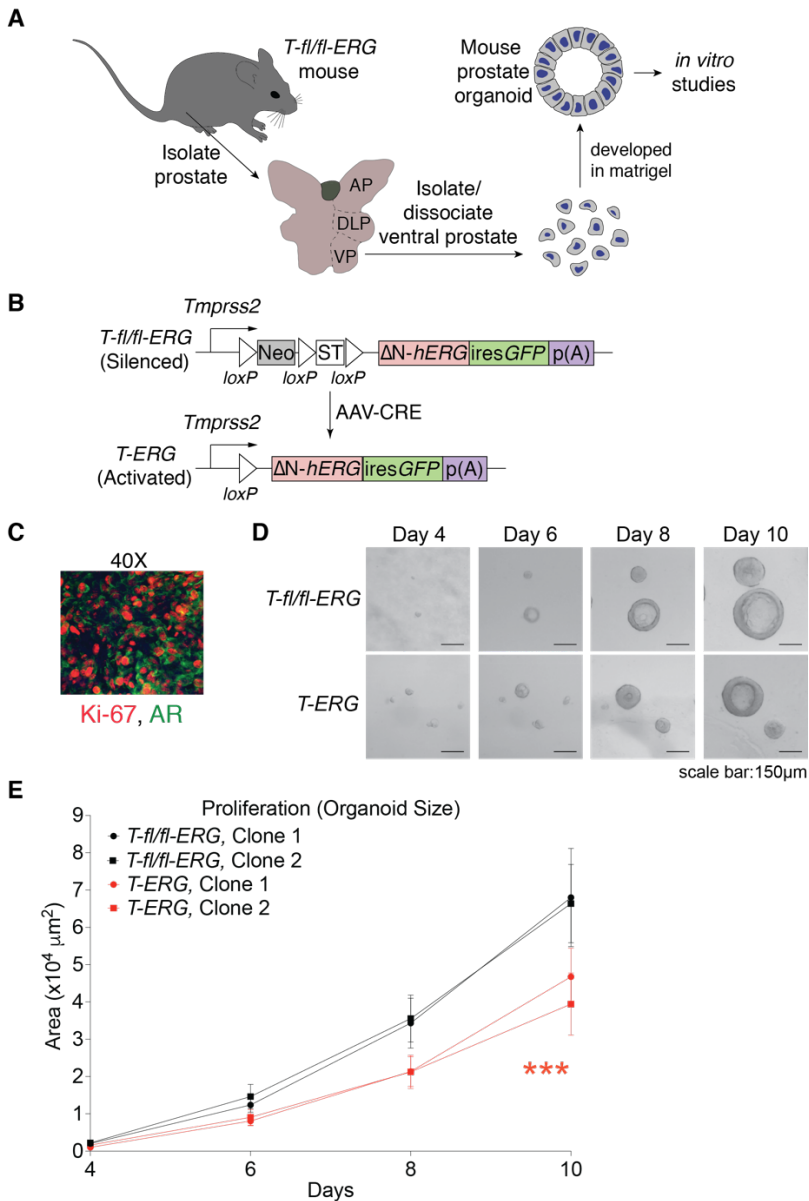

**Figure S4. Growth of primary prostate organoids.** (A) Scheme of development of primary prostate organoids. A mouse prostate was harvested from a mouse carrying an inducible *Tmprss2-fl/fl-ERG* (*T-fl/fl-ERG*) fusion. AP: anterior prostate; DLP: dorsolateral prostate; VP: ventral prostate. (B) Induction of T-ERG expression by Cre-mediated excision. AAV-Cre: adeno-associated virus containing Cre recombinase driven by a CMV promoter. (C) A wild-type mouse prostate organoid expresses both the proliferative marker, Ki67 (in red) and the prostatic marker, androgen receptor (AR, in green). Images were taken using a spinning disk confocal microscope with 40X objective magnification. (D, E) Proliferation measured by organoid size over time. 400 cells were seeded, and example time-lapse pictures are shown in (D). Quantification is in (E). Each dot represents an average over 18 independently growing organoids, with 95% confidence interval (CI) (error bar), at each indicated timepoint. \*\*\* $p < 0.001$ , Linear regression comparing slopes between *T-fl/fl-ERG* and *T-ERG*.



**A**

| RANK | TOP 20 Enriched GSEA Pathways in T-ERG over T-fl/fl-ERG organoids | NES  | FDR q  |
|------|-------------------------------------------------------------------|------|--------|
| 1    | METABOLISM_OF_RNA                                                 | 3.16 | <0.001 |
| 2    | CELL_CYCLE_CHECKPOINTS                                            | 3.12 | <0.001 |
| 3    | RRNA_PROCESSING                                                   | 3.06 | <0.001 |
| 4    | RESOLUTION_OF_SISTER_CHROMATID_COHESION                           | 3.01 | <0.001 |
| 5    | RRNA_MODIFICATION_IN_THE_NUCLEUS_AND_CYTOSOL                      | 2.99 | <0.001 |
| 6    | SEPARATION_OF_SISTER_CHROMATIDS                                   | 2.98 | <0.001 |
| 7    | CELL_CYCLE                                                        | 2.96 | <0.001 |
| 8    | DNA_REPLICATION                                                   | 2.96 | <0.001 |
| 9    | MITOTIC_METAPHASE_AND_ANAPHASE                                    | 2.95 | <0.001 |
| 10   | CELL_CYCLE_MITOTIC                                                | 2.93 | <0.001 |
| 11   | PROCESSING_OF_CAPPED_INTRON_CONTAINING_PRE_MRNA                   | 2.91 | <0.001 |
| 12   | TRNA_PROCESSING                                                   | 2.89 | <0.001 |
| 13   | DNA_REPLICATION_PRE_INITIATION                                    | 2.88 | <0.001 |
| 14   | MITOTIC_SPINDLE_CHECKPOINT                                        | 2.88 | <0.001 |
| 15   | MITOTIC_G1_PHASE_AND_G1_S_TRANSITION                              | 2.88 | <0.001 |
| 16   | MITOTIC_PROMETAPHASE                                              | 2.83 | <0.001 |
| 17   | S_PHASE                                                           | 2.83 | <0.001 |
| 18   | CHROMOSOME_MAINTENANCE                                            | 2.82 | <0.001 |
| 19   | G2_M_CHECKPOINTS                                                  | 2.80 | <0.001 |
| 20   | M_PHASE                                                           | 2.79 | <0.001 |

**B**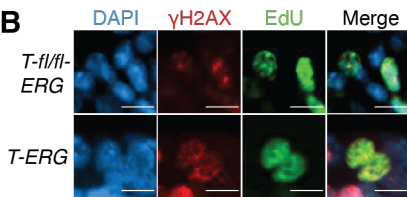**C**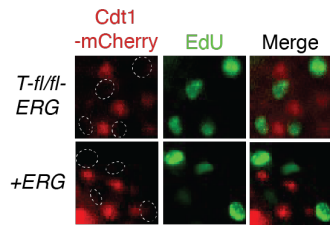**D**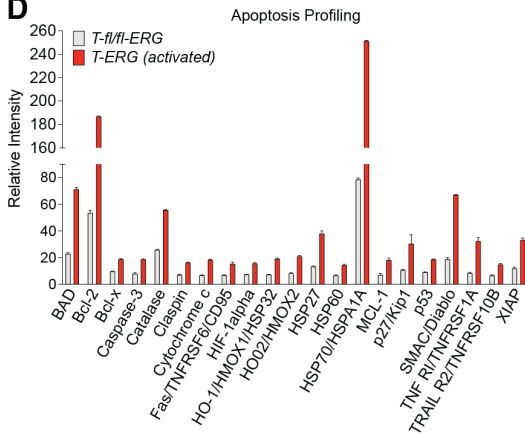

| Type        | Total # of organoids/cells | % EdU/Cdt1 overlap |
|-------------|----------------------------|--------------------|
| T-fl/fl-ERG | 10/492                     | 0%                 |
| +ERG        | 12/574                     | 0%                 |

**E**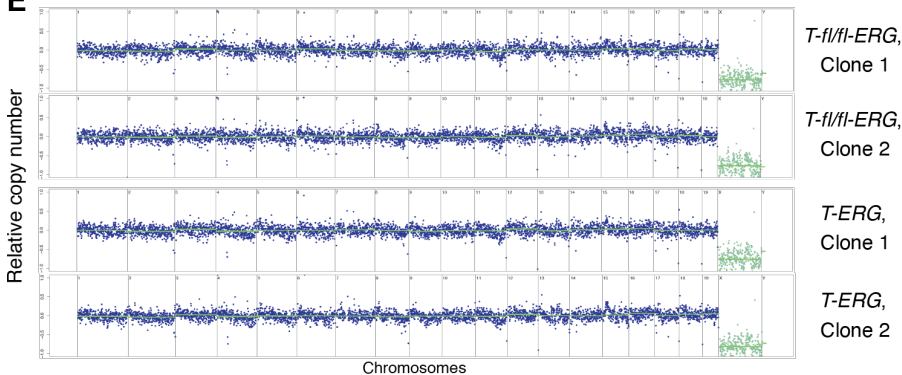

**Figure S5. Cellular impact of T-ERG in prostate organoids. (A)** Top 20 pathways indicated by GSEA NES and FDR q values. **(B)** Example images of cells stained for DNA (DAPI, blue)  $\gamma$ H2AX (red), and

EdU (green) in prostate organoids. Images were taken using a spinning disk confocal microscope with 40X objective magnification. Scale bar: 5 $\mu$ m. **(C)** EdU incorporation in cells harboring Cdt1-mCherry. Top pictures: Example images of nuclei with stained EdU (green) and Cdt1-mCherry (red) signals in organoids; white dash lines outline the positions of EdU positive cells. Bottom table: quantification of cells with both EdU and Cdt1 over total amount of assessed cells. Cdt1 is present in G1 phase. **(D)** Expression of apoptosis-related proteins was upregulated upon T-ERG expression. Each bar represents the mean of 2 technical replicates with SEM (error bar). **(E)** All organoids are euploid by the end of all our analyses, determined by low-coverage whole genome sequencing within 30-day growth (within the time frame of all analyses in this paper).

**A**

| RANK | Top 20 Enriched GSEA Pathways in <i>Rad21</i> over <i>Vector</i> in <i>T-ERG</i> organoids | NES  | FDR q  |
|------|--------------------------------------------------------------------------------------------|------|--------|
| 1    | RESOLUTION_OF_SISTER_CHROMATID_COHESIN                                                     | 3.01 | <0.001 |
| 2    | MITOTIC_SPINDLE_CHECKPOINT                                                                 | 2.92 | <0.001 |
| 3    | MITOTIC_PROMETAPHASE                                                                       | 2.87 | <0.001 |
| 4    | RETINOBLASTOMA_GENE_IN_CANCER                                                              | 2.84 | <0.001 |
| 5    | CELL_CYCLE_CHECKPOINTS                                                                     | 2.78 | <0.001 |
| 6    | RHO_GTPASES_ACTIVATE_FORMINS                                                               | 2.75 | <0.001 |
| 7    | PLK1_PATHWAY                                                                               | 2.74 | <0.001 |
| 8    | CELL_CYCLE_MITOTIC                                                                         | 2.73 | <0.001 |
| 9    | AURORA_B_PATHWAY                                                                           | 2.72 | <0.001 |
| 10   | MITOTIC_METAPHASE_AND_ANAPHASE                                                             | 2.70 | <0.001 |
| 11   | CELL_CYCLE                                                                                 | 2.67 | <0.001 |
| 12   | SEPARATION_OF_SISTER_CHROMATIDS                                                            | 2.66 | <0.001 |
| 13   | M_PHASE                                                                                    | 2.57 | <0.001 |
| 14   | RRNA_PROCESSING                                                                            | 2.55 | <0.001 |
| 15   | ACTIVATION_OF_ATR_IN_RESPONSE_TO_REPLICATION_STRESS                                        | 2.55 | <0.001 |
| 16   | DNA_STRAND_ELONGATION                                                                      | 2.51 | <0.001 |
| 17   | FOXM1_PATHWAY                                                                              | 2.48 | <0.001 |
| 18   | DNA_REPLICATION                                                                            | 2.48 | <0.001 |
| 19   | DNA_REPLICATION                                                                            | 2.48 | <0.001 |
| 20   | G1_S_SPECIFIC_TRANSCRIPTION                                                                | 2.43 | <0.001 |

**B**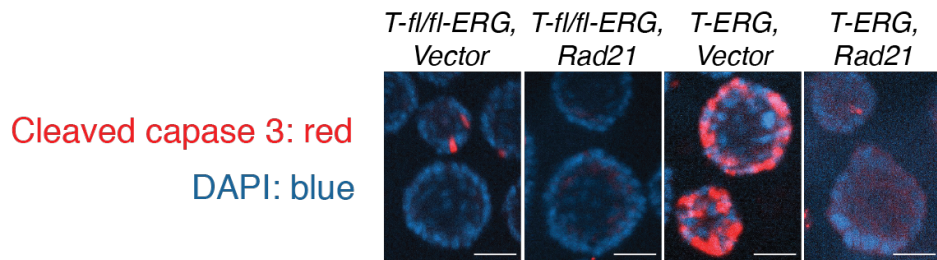

**Figure S6.** Influences of *Tmprss2-ERG* and *Rad21* in cell physiology of prostate organoids. **(A)** Top 20 pathways indicated by GSEA normalized enrichment score (NES). **(B)** Example image of cells stained for DNA (DAPI) and cleaved caspase 3 in prostate organoids. Scale bar: 30 $\mu$ m.

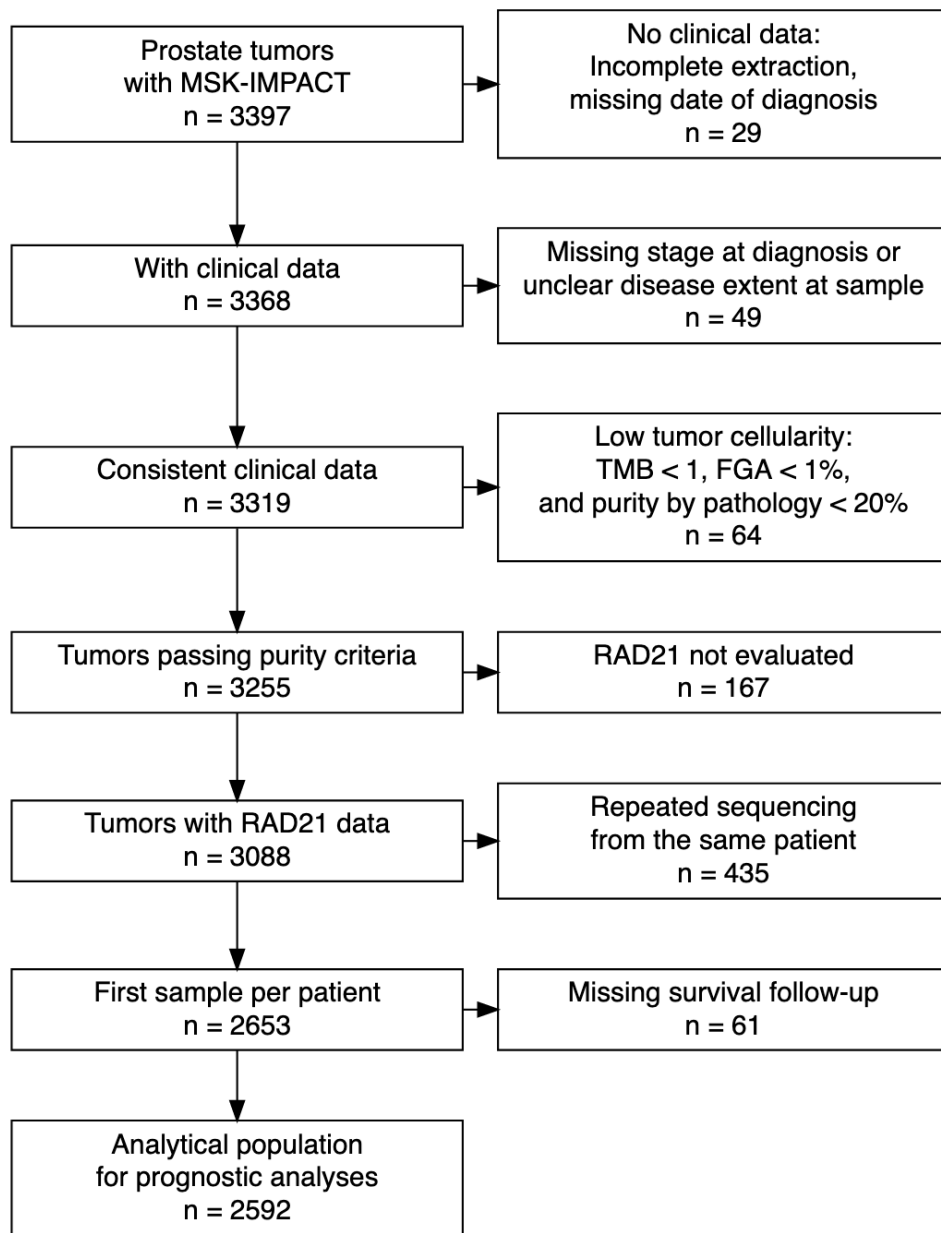

**Figure S7.** Flowchart of sample and patient inclusion, Memorial Sloan Kettering Cancer Center MSK-IMPACT Prostate Clinical-Genomic Database, 2014–2020.

## Supporting text

### ***Additional Methods***

#### *RNA Sequencing and Data Analysis*

RNA quantification and quality control (QC) were assessed individually using the AATI Fragment Analyzer. 5 replicates of RNA per each sample type were subjected to RNA-seq with QC. Following the template switching reaction, barcoded cDNA samples were pooled, treated with Exonuclease I and cleaned using RNA Ampure beads. Second strand synthesis and PCR amplification were performed using the Advantage 2 Polymerase Mix (Clontech) and the SINGV6 primer (IDT). 12 cycles of PCR were performed, followed by clean up using regular SPRI beads. Successful amplification of cDNA was confirmed using the Fragment Analyzer. Illumina libraries were then produced using standard Nextera tagmentation substituting P5NEXTPT5-bmc primer. Finally, libraries were cleaned using SPRI beads at 1X and quantified using the Fragment Analyzer and qPCR before being loaded for 40X40 paired-end sequencing using the Illumina NextSeq500. After sequencing, quality control on each of the libraries was performed to assess coverage depth, enrichment for messenger RNA (exon/intron and exon/intergenic density ratios), fraction of rRNA reads and number of detected genes using bespoke scripts. The sequencing reads were mapped to the mm10 reference using star/2.5.3a. The negative strand sequences mapped to each gene were counted by rsem/1.3.0. Raw counts were normalized by DESeq2.

#### *Karyotyping Sequencing and Data Analysis*

Standard Nextera XT Illumina library prep was applied, and the libraries sequenced with 40bp read length on an Illumina NextSeq500. Sequence reads were trimmed to 40 nucleotides and the resultant reads were aligned to the mouse (mm9) using the BWA (0.7.12) backtrack algorithm (1). HMMcopy (0.1.1) was used to detect copy number alterations by estimating DNA copy number in 500-kb bins controlling for mappability and GC content (calculated by HMMcopy gcCounter) (2).

### **SI references**

1. H. Li, R. Durbin, Fast and accurate short read alignment with Burrows-Wheeler transform. *Bioinformatics* **25**, 1754-1760 (2009).
2. G. Ha *et al.*, Integrative analysis of genome-wide loss of heterozygosity and monoallelic expression at nucleotide resolution reveals disrupted pathways in triple-negative breast cancer. *Genome Res* **22**, 1995-2007 (2012).
